# Supplementary material for: Maize Field Study Reveals Covaried Microbiota and Metabolic Changes in Roots over Plant Growth
Source: PubMed Central journal article supplement (PMC9040757; doi:10.1128/mbio.02584-21), 2022-03-08

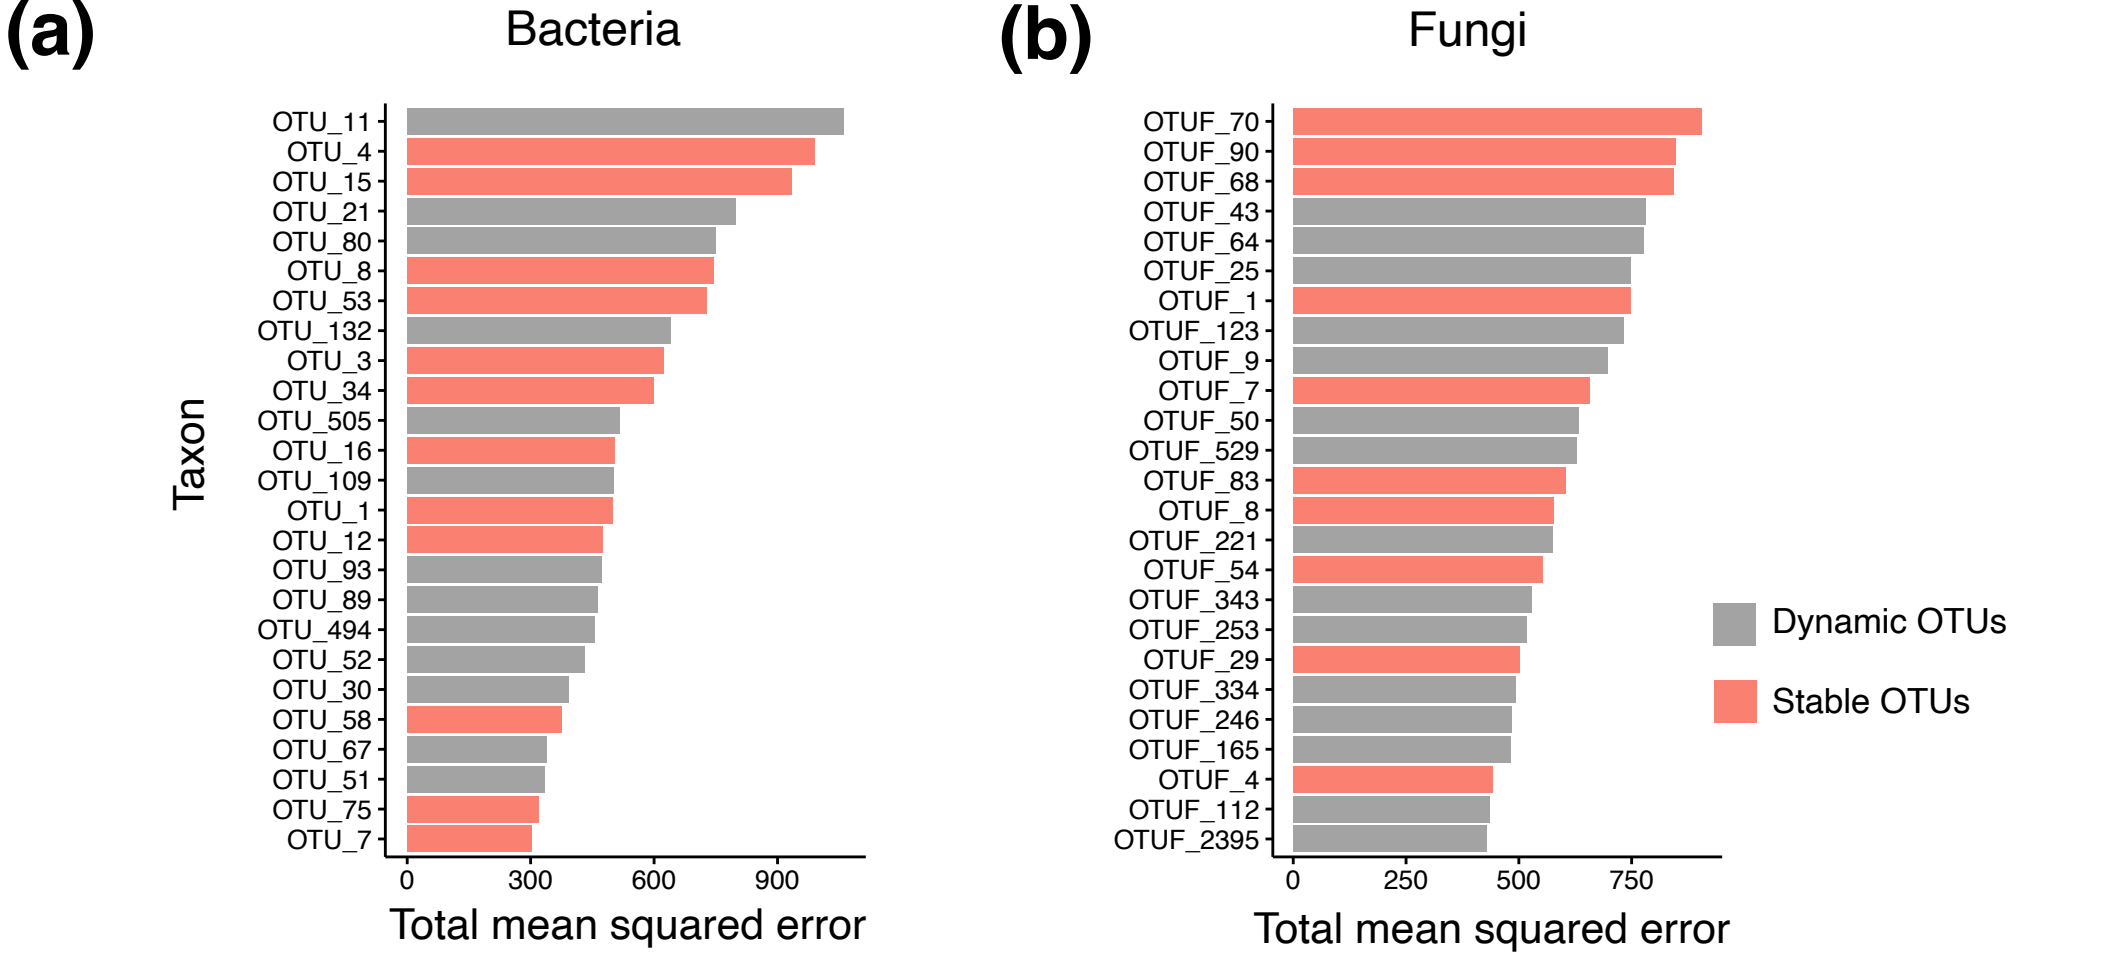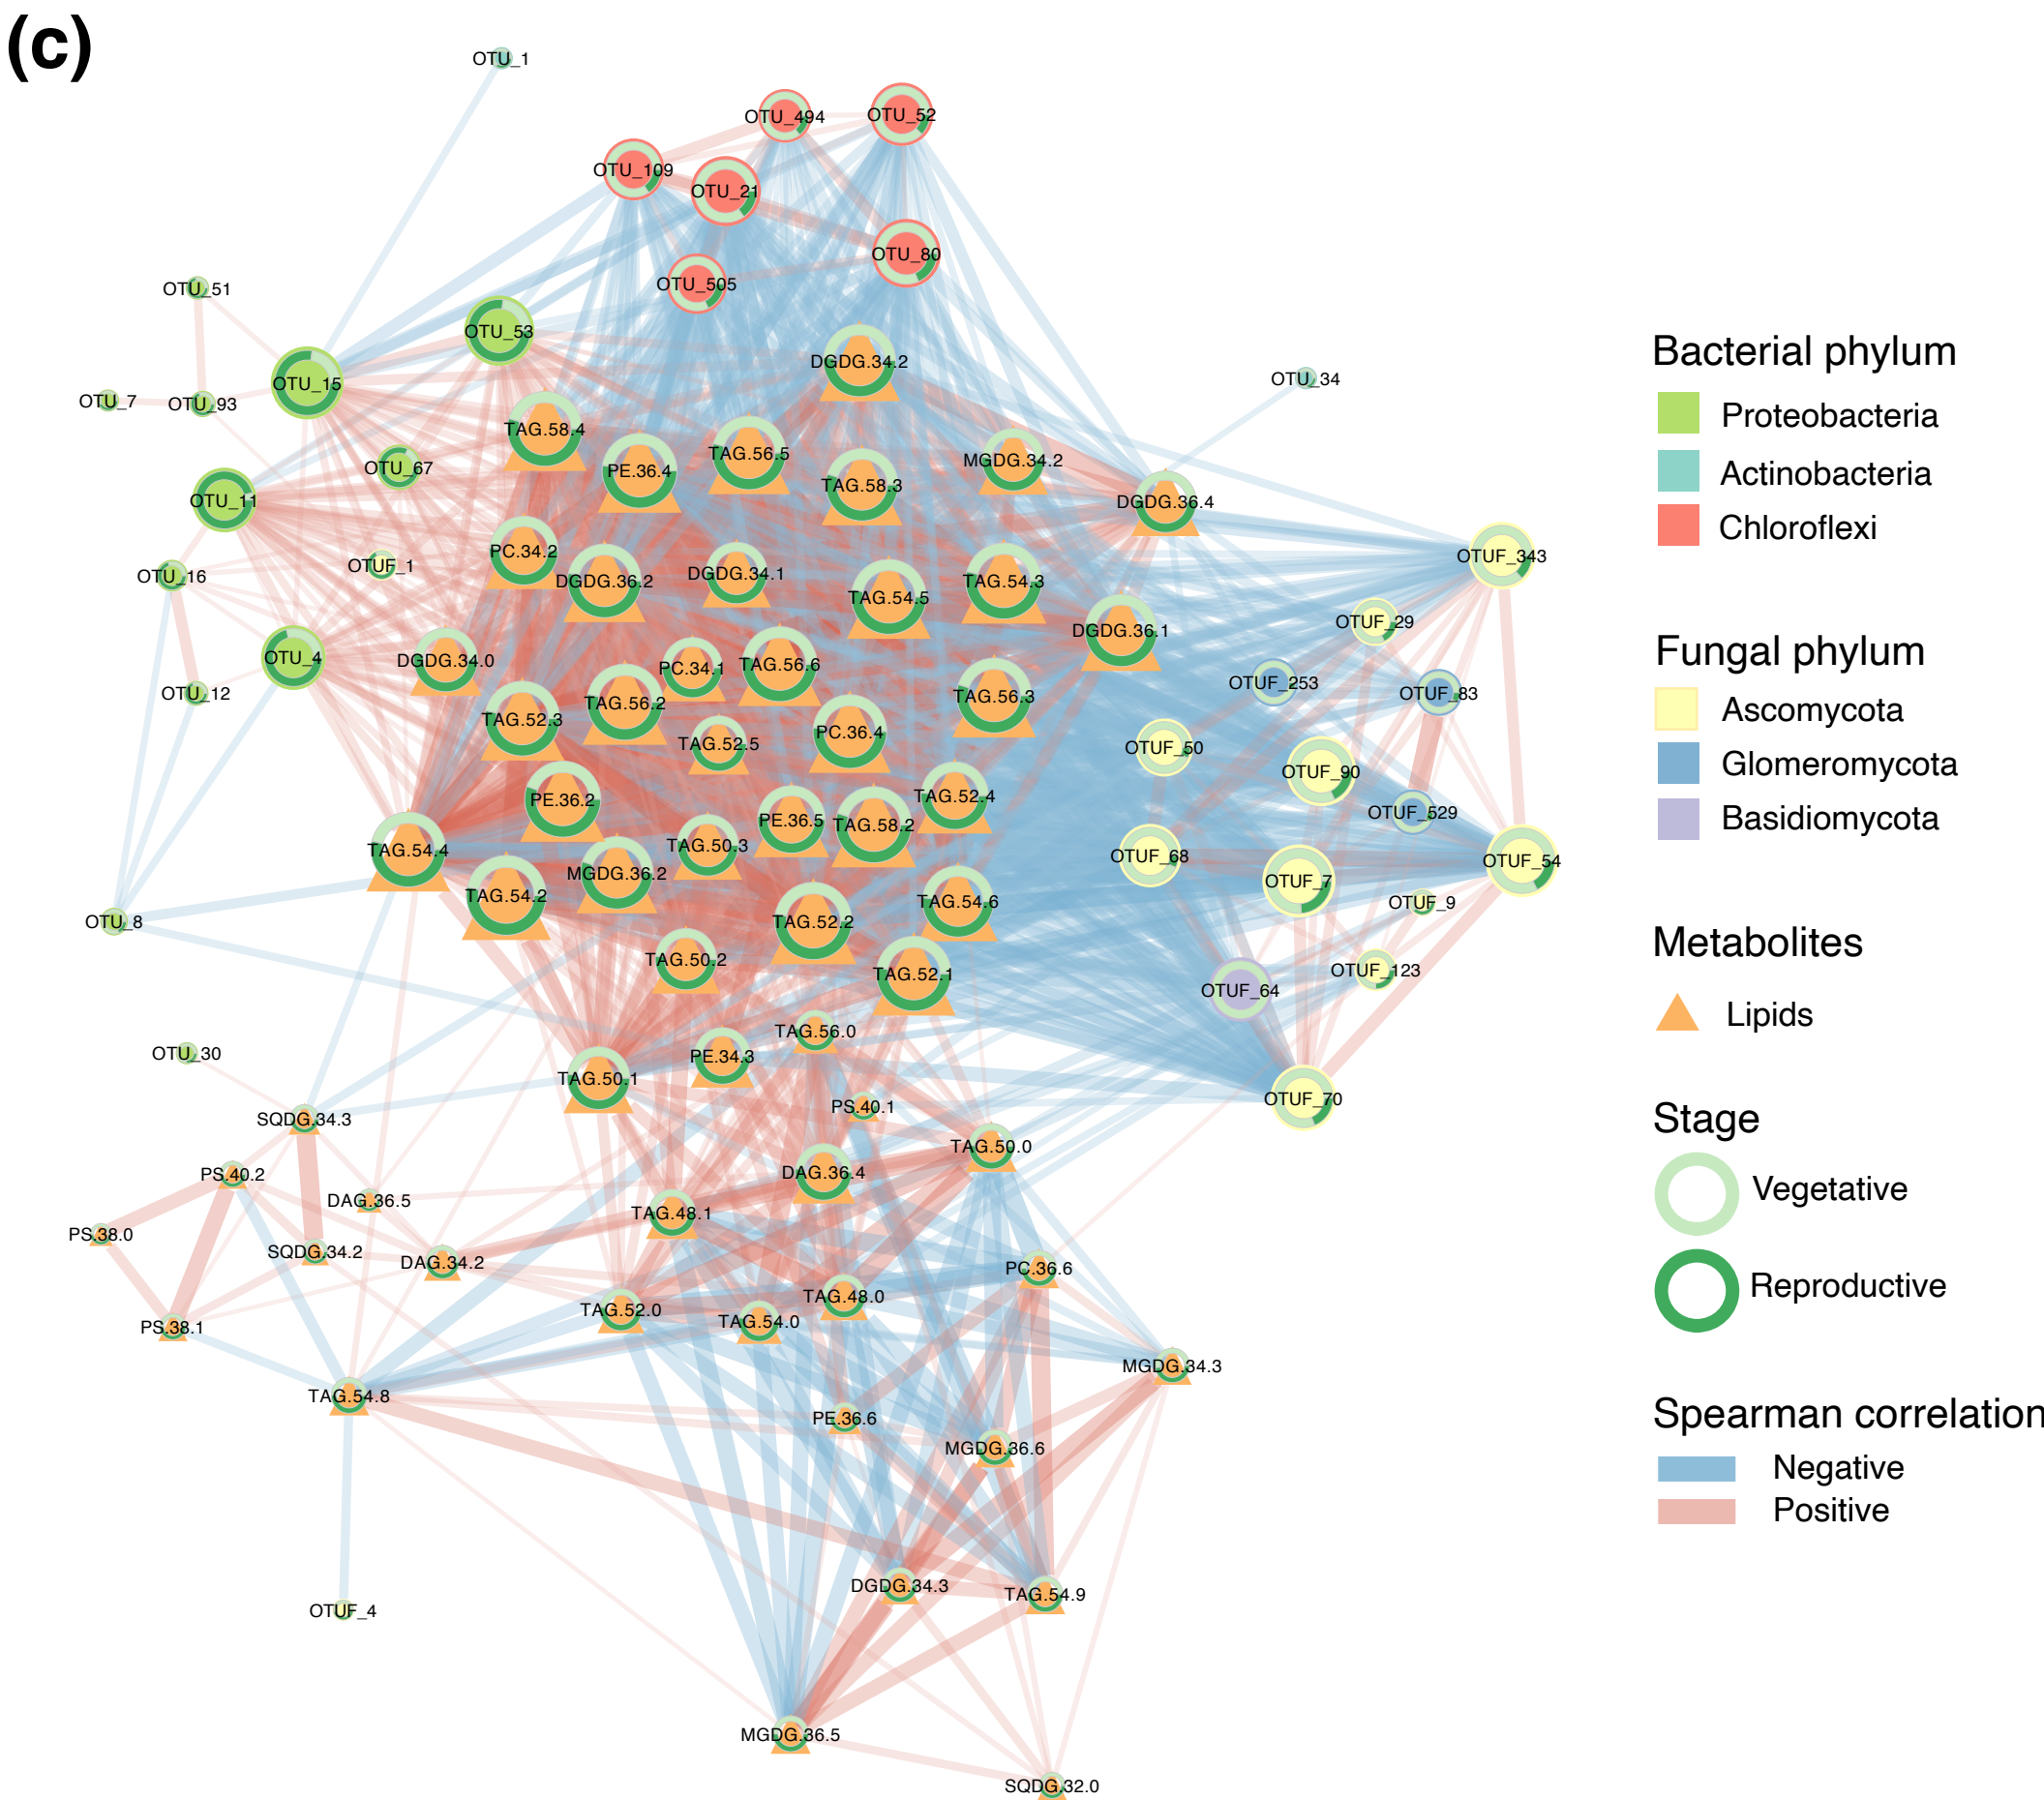

Supplement: mbio.02584-21-sf007.pdf [file mbio.02584-21-sf007.pdf]
