# Supplementary material for: Maize Field Study Reveals Covaried Microbiota and Metabolic Changes in Roots over Plant Growth
Source: PubMed Central journal article supplement (PMC9040757; doi:10.1128/mbio.02584-21), 2022-03-08
Supplement: mbio.02584-21-st001.pdf [file mbio.02584-21-st001.pdf]

**Table S1** Four different soil managements NK, NPK, CONMIN and BIODYN were applied on the DEMO (fertilization DEMONstration experiment, Reckenholz) and DOK (Dynamic, organic and conventional managements, Therwil) long-term fields and corresponding soil parameters were measured before sowing. (a)  $N_{tot}$ : total nitrogen,  $N_{org}$ : organic nitrogen,  $N_{min}$ : mineralisable nitrogen. NK: N and K fertilization, NPK: N, P and K fertilization, CON: CONMIN (conventional mineral fertilization) and BIO: BIODYN (biodynamic). In the “Input” section the amount of complex compounds amended on soil is specified and the resulting amount of P and K is symbolized by the arrow. (b) Measurements were performed on the DEMO and DOK fields subjected to four different soil managements (NK, NPK, CONMIN, and BIODYN). pH  $H_2O$ : pH in aqueous solution, pH  $CaCl_2$ : pH in salt solution,  $C_{org}$ : organic carbon, N: total nitrogen, C/N: carbon/nitrogen ratio, POXC: labile organic carbon, sand content, silt content, clay content, LM: large macro-aggregates (> 2000  $\mu m$ ), SM: small macro-aggregates (250 - 2000  $\mu m$ ),  $\mu A$ : micro-aggregates (53 - 250  $\mu m$ ), S+C: silt and clay fraction (< 53  $\mu m$ ), CEC: cation exchange capacity, BS: base saturation, Mno: Mn(III)oxide content, Feo: short-range ordered Fe(III) oxide content, Fed: total FeIII oxide content, Mg: magnesium, K: potassium, Ca: calcium, P: phosphorus, Mn: manganese, Fe: iron, Cu: copper, Zn: zinc, Na: sodium, Mo: molybdenum, Al: aluminum, KW: aqua regia extractable elements). Mean and standard deviation (n = 6, for  $C_{org}$ , N, C/N, POXC; n = 12, for LM, SM, and  $\mu A$ ; and n = 4 for S+C).

(a)

|                                | DEMO NK                                                                                                                                                                                                                                                 | DEMO NPK                                                                                                                                                                                                                                                        | DOK CONMIN                                                  | DOK BIODYN                                                             |
|--------------------------------|---------------------------------------------------------------------------------------------------------------------------------------------------------------------------------------------------------------------------------------------------------|-----------------------------------------------------------------------------------------------------------------------------------------------------------------------------------------------------------------------------------------------------------------|-------------------------------------------------------------|------------------------------------------------------------------------|
| <b>Fertilization scheme</b>    |                                                                                                                                                                                                                                                         |                                                                                                                                                                                                                                                                 |                                                             |                                                                        |
| Farmyard manure (FYM)          | -                                                                                                                                                                                                                                                       | -                                                                                                                                                                                                                                                               | -                                                           | 30 m <sup>3</sup> /ha (autumn 2016)<br>Composted FYM + slurry (Jauche) |
| Mineral                        | N: ammonium sulphate (21% N, 24% S) / ammonium nitrate<br>K: potassium sulphate (50% K <sub>2</sub> O, 18% S)<br>P: triple superphosphate (46% P <sub>2</sub> O <sub>5</sub> , 12% Ca)<br>Mg: Granumag (10% MgSO <sub>4</sub> , 19% MgCO <sub>3</sub> ) | N: ammonium sulphate (21% N, 24% S) / ammonium nitrate (27% N)<br>K: potassium sulphate (50% K <sub>2</sub> O, 18% S)<br>P: triple superphosphate (46% P <sub>2</sub> O <sub>5</sub> , 12% Ca)<br>Mg: Granumag (10% MgSO <sub>4</sub> , 19% MgCO <sub>3</sub> ) | Synthetic (NPK) according to Swiss fertilization ordination | -                                                                      |
| <b>Input</b>                   |                                                                                                                                                                                                                                                         |                                                                                                                                                                                                                                                                 |                                                             |                                                                        |
| Dry matter                     | -                                                                                                                                                                                                                                                       | -                                                                                                                                                                                                                                                               | -                                                           | 1020 kg/ha                                                             |
| Organic matter                 | -                                                                                                                                                                                                                                                       | -                                                                                                                                                                                                                                                               | -                                                           | 720 kg/ha                                                              |
| $N_{tot}$                      | $N_{min}$ in soil: 90 kg N/ha (02.06.17)<br>Ammonium sulphate: 55 kg N/ha (13.06.17)<br>Ammonium nitrate: 45 kg/ha (22.06.17)                                                                                                                           | $N_{min}$ in soil: 90 kg N/ha (02.06.17)<br>Ammonium sulphate: 55 kg N/ha (13.06.17)<br>Ammonium nitrate: 45 kg/ha (22.06.17)                                                                                                                                   | 40 kg N/ha (15.06.17)<br>Calcium ammonium nitrate-20%       | 32 kg/ha                                                               |
| $N_{org}$                      | -                                                                                                                                                                                                                                                       | -                                                                                                                                                                                                                                                               | -                                                           | 19 kg/ha                                                               |
| P                              | 0 kg P <sub>2</sub> O <sub>5</sub> /ha → 0 kg P/ha                                                                                                                                                                                                      | 75 kg P <sub>2</sub> O <sub>5</sub> /ha → 33 kg P/ha                                                                                                                                                                                                            | Not added in 2017                                           | 10 kg/ha                                                               |
| K                              | 240 kg K <sub>2</sub> O/ha → 200 kg K/ha                                                                                                                                                                                                                | 240 kg K <sub>2</sub> O/ha → 200 kg K/ha                                                                                                                                                                                                                        | Not added in 2017                                           | 69 kg/ha                                                               |
| Ca / CaO                       | -                                                                                                                                                                                                                                                       | No special Ca and lime fertilizer (12% Ca in triple superphosphate)                                                                                                                                                                                             | 26 kg/ha<br>Calcium ammonium nitrate-13%                    | 30 kg/ha                                                               |
| Mg                             | -                                                                                                                                                                                                                                                       | 20 kg Mg/ha                                                                                                                                                                                                                                                     | 9 kg/ha<br>Calcium ammonium nitrate-4.5%                    | 11 kg/ha                                                               |
| S                              | Parts N and K fertilizer                                                                                                                                                                                                                                | Parts N and K fertilizer                                                                                                                                                                                                                                        | -                                                           | -                                                                      |
| <b>Plant protection scheme</b> |                                                                                                                                                                                                                                                         |                                                                                                                                                                                                                                                                 |                                                             |                                                                        |
| Weed control                   | Mechanical (no herbicides due to sensitivity of the inbred lines)                                                                                                                                                                                       | Mechanical (no herbicides due to sensitivity of the inbred lines)                                                                                                                                                                                               | Mechanical and herbicides                                   | Mechanical                                                             |
| Disease control                | -                                                                                                                                                                                                                                                       | -                                                                                                                                                                                                                                                               | Chemical (damage threshold)                                 | Indirect methods                                                       |
| Insect control                 | Trichogramma (European corn borer)                                                                                                                                                                                                                      | Trichogramma (European corn borer)                                                                                                                                                                                                                              | Chemical (damage threshold)                                 | Plant extracts, biocontrol                                             |
| Special treatments             | -                                                                                                                                                                                                                                                       | -                                                                                                                                                                                                                                                               | Plant growth regulators                                     | Biodynamic preparations                                                |
| Irrigation                     | -                                                                                                                                                                                                                                                       | -                                                                                                                                                                                                                                                               | 20L/m <sup>2</sup> (19.06.17)                               | 20L/m <sup>2</sup> (19.06.17)                                          |

(b)

|                            |                                 | DEMO (Reckenholz) |                   |                   | DOK (Therwil)                               |                   |                    |                                   |                   |                    |
|----------------------------|---------------------------------|-------------------|-------------------|-------------------|---------------------------------------------|-------------------|--------------------|-----------------------------------|-------------------|--------------------|
|                            |                                 | NK fertilization  |                   | NPK fertilization | Mineral conventional fertilization (CONMIN) |                   |                    | Biodynamic fertilization (BIODYN) |                   |                    |
|                            |                                 | NK                |                   | NPK               | CONMIN-1                                    | CONMIN-2          | CONMIN-3           | BIODYN-1                          | BIODYN-2          | BIODYN-3           |
| pH                         | pH_H2O                          | -                 | 5.97 ± 0.13       | 6.85 ± 0.13       | 6.36 ± 0.11                                 | 5.91 ± 0.16       | 6.81 ± 0.14        | 6.93 ± 0.27                       | 7.08 ± 0.15       | 7.02 ± 0.20        |
|                            | pH_CaCl2                        | -                 | 5.15 ± 0.17       | 5.94 ± 0.14       | 5.53 ± 0.20                                 | 4.86 ± 0.13       | 5.74 ± 0.16        | 5.95 ± 0.30                       | 6.04 ± 0.15       | 6.02 ± 0.18        |
| Organic matter             | Corg                            | (g/Kg)            | 11.49 ± 0.65      | 15.51 ± 0.35      | 14.66 ± 0.29                                | 12.90 ± 0.48      | 18.29 ± 0.50       | 17.26 ± 0.85                      | 17.65 ± 0.49      | 22.36 ± 0.52       |
|                            | N                               | (g/Kg)            | 1.68 ± 0.10       | 2.16 ± 0.06       | 1.98 ± 0.06                                 | 1.73 ± 0.09       | 2.40 ± 0.06        | 2.18 ± 0.07                       | 2.25 ± 0.09       | 2.83 ± 0.08        |
|                            | C/N                             | -                 | 6.82 ± 0.21       | 7.19 ± 0.11       | 7.42 ± 0.26                                 | 7.46 ± 0.23       | 7.64 ± 0.15        | 7.91 ± 0.17                       | 7.85 ± 0.18       | 7.91 ± 0.18        |
|                            | POXC                            | (mg/Kg)           | 207.46 ± 31.36    | 404.28 ± 28.52    | 451.83 ± 38.48                              | 263.37 ± 20.42    | 423.11 ± 48.06     | 488.61 ± 42.72                    | 525.21 ± 26.44    | 577.32 ± 35.26     |
| Particle size distribution | Sand                            | (g/Kg)            | 450.77 ± 10.43    | 390.45 ± 8.95     | 53.21 ± 1.66                                | 54.67 ± 1.98      | 30.18 ± 4.79       | 55.37 ± 1.47                      | 53.23 ± 2.55      | 24.83 ± 1.09       |
|                            | Silt                            | (g/Kg)            | 433.48 ± 8.25     | 485.38 ± 6.21     | 833.82 ± 5.56                               | 840.14 ± 2.10     | 822.77 ± 3.36      | 840.01 ± 1.19                     | 836.73 ± 3.29     | 830.24 ± 1.28      |
|                            | Clay                            | (g/Kg)            | 115.75 ± 2.34     | 124.17 ± 2.81     | 112.97 ± 4.78                               | 105.19 ± 3.20     | 147.05 ± 2.92      | 104.63 ± 1.51                     | 110.04 ± 4.17     | 144.93 ± 0.99      |
| Soil aggregation           | LM                              | %                 | 14.05 ± 4.31      | 16.83 ± 4.33      | 6.34 ± 4.40                                 | 2.31 ± 1.82       | 8.62 ± 5.07        | 4.63 ± 1.76                       | 2.95 ± 1.05       | 10.97 ± 4.76       |
|                            | SM                              | %                 | 42.22 ± 5.38      | 48.17 ± 2.47      | 50.03 ± 5.43                                | 41.60 ± 4.52      | 39.98 ± 4.00       | 46.49 ± 2.43                      | 55.35 ± 8.00      | 49.88 ± 6.03       |
|                            | µA                              | %                 | 38.25 ± 3.85      | 30.25 ± 2.61      | 29.58 ± 8.89                                | 38.10 ± 3.98      | 37.37 ± 5.51       | 30.08 ± 1.47                      | 26.74 ± 6.56      | 27.48 ± 7.79       |
|                            | S+C                             | %                 | 5.48 ± 1.18       | 4.74 ± 0.39       | 13.97 ± 1.12                                | 17.93 ± 3.71      | 14.02 ± 1.74       | 18.80 ± 0.56                      | 14.96 ± 2.37      | 11.60 ± 3.02       |
| Nutrient retention         | CEC                             | (cmol/Kg)         | 14.42 ± 2.21      | 16.58 ± 0.99      | 12.71 ± 0.30                                | 9.69 ± 0.31       | 19.69 ± 0.33       | 13.67 ± 0.82                      | 14.91 ± 0.29      | 20.62 ± 0.23       |
|                            | BS                              | %                 | 76.21 ± 14.12     | 94.78 ± 4.54      | 105.16 ± 5.40                               | 102.92 ± 4.43     | 95.06 ± 1.36       | 103.58 ± 4.40                     | 104.04 ± 3.19     | 96.91 ± 2.81       |
| Oxides                     | Mno                             | (g/Kg)            | 0.39 ± 0.03       | 0.46 ± 0.02       | 0.44 ± 0.05                                 | 0.41 ± 0.03       | 0.40 ± 0.01        | 0.40 ± 0.04                       | 0.46 ± 0.09       | 0.37 ± 0.02        |
|                            | Feo                             | (g/Kg)            | 2.18 ± 0.09       | 2.29 ± 0.06       | 2.51 ± 0.10                                 | 2.27 ± 0.03       | 3.10 ± 0.07        | 2.33 ± 0.08                       | 2.63 ± 0.10       | 3.13 ± 0.09        |
|                            | Fed                             | (g/Kg)            | 8.44 ± 0.23       | 9.38 ± 0.21       | 8.11 ± 0.28                                 | 7.08 ± 0.12       | 10.88 ± 0.29       | 7.12 ± 0.21                       | 7.83 ± 0.07       | 10.36 ± 0.56       |
| Plant available nutrients  | Mg                              | (mg/Kg)           | 11.13 ± 4.05      | 16.83 ± 1.99      | 15.94 ± 2.15                                | 14.58 ± 0.70      | 16.78 ± 2.09       | 19.24 ± 4.48                      | 20.35 ± 2.69      | 22.71 ± 2.88       |
|                            | K                               | (mg/Kg)           | 10.77 ± 5.10      | 6.10 ± 1.01       | 15.77 ± 4.81                                | 17.47 ± 6.39      | 7.72 ± 2.52        | 17.43 ± 5.98                      | 18.65 ± 6.02      | 11.32 ± 2.20       |
|                            | Ca                              | (mg/Kg)           | 57.63 ± 19.13     | 142.56 ± 23.09    | 102.86 ± 9.64                               | 70.90 ± 5.98      | 149.71 ± 24.88     | 157.55 ± 34.14                    | 163.57 ± 15.79    | 181.18 ± 19.27     |
|                            | P                               | (mg/Kg)           | 0.95 ± 0.48       | 1.32 ± 0.21       | 2.20 ± 0.43                                 | 2.20 ± 0.52       | 1.27 ± 0.29        | 2.97 ± 0.89                       | 3.05 ± 0.74       | 2.68 ± 0.27        |
|                            | Mn                              | (mg/Kg)           | 1.98 ± 0.67       | 1.41 ± 0.20       | 2.01 ± 0.33                                 | 3.18 ± 0.49       | 1.67 ± 0.23        | 1.58 ± 0.26                       | 1.25 ± 0.15       | 1.10 ± 0.15        |
|                            | Fe                              | (mg/Kg)           | 17.65 ± 12.67     | 2.31 ± 1.05       | 8.32 ± 1.93                                 | 11.67 ± 2.34      | 1.79 ± 0.94        | 2.34 ± 0.91                       | 3.53 ± 1.53       | 2.59 ± 1.15        |
|                            | Cu                              | (mg/Kg)           | 0.11 ± 0.04       | 0.13 ± 0.02       | 0.13 ± 0.01                                 | 0.14 ± 0.01       | 0.09 ± 0.01        | 0.11 ± 0.01                       | 0.11 ± 0.01       | 0.12 ± 0.01        |
|                            | Zn                              | (mg/Kg)           | 0.08 ± 0.05       | 0.02 ± 0.01       | 0.06 ± 0.01                                 | 0.09 ± 0.02       | 0.02 ± 0.00        | 0.04 ± 0.01                       | 0.04 ± 0.01       | 0.04 ± 0.01        |
|                            | Na                              | (mg/Kg)           | 5.90 ± 2.05       | 6.36 ± 0.97       | 7.77 ± 1.60                                 | 6.25 ± 1.48       | 7.91 ± 1.87        | 8.18 ± 1.25                       | 8.49 ± 2.01       | 11.88 ± 2.85       |
|                            | Mo                              | (mg/Kg)           | 0.00 ± 0.00       | 0.00 ± 0.00       | 0.00 ± 0.00                                 | 0.00 ± 0.00       | 0.00 ± 0.00        | 0.00 ± 0.00                       | 0.00 ± 0.00       | 0.00 ± 0.00        |
|                            | aqua-regia extractable elements | Mg_KW             | (mg/Kg)           | 4263.90 ± 59.22   | 5191.82 ± 111.83                            | 3593.33 ± 140.11  | 3322.90 ± 83.40    | 5089.09 ± 178.40                  | 3189.94 ± 70.09   | 3607.76 ± 84.46    |
| K_KW                       |                                 | (mg/Kg)           | 4873.71 ± 176.11  | 5883.75 ± 219.21  | 4449.99 ± 274.39                            | 4175.58 ± 303.73  | 6349.11 ± 193.15   | 4072.33 ± 82.48                   | 4577.32 ± 148.38  | 6168.40 ± 222.35   |
| Ca_KW                      |                                 | (mg/Kg)           | 2090.19 ± 160.41  | 2958.86 ± 148.25  | 3192.51 ± 120.60                            | 2625.98 ± 162.90  | 3608.36 ± 139.05   | 3049.04 ± 142.90                  | 3356.22 ± 64.81   | 3718.40 ± 156.35   |
| P_KW                       |                                 | (mg/Kg)           | 341.50 ± 17.93    | 487.43 ± 18.57    | 451.37 ± 29.85                              | 441.48 ± 21.92    | 536.92 ± 21.95     | 422.11 ± 21.24                    | 482.49 ± 14.36    | 571.17 ± 15.91     |
| Mn_KW                      |                                 | (mg/Kg)           | 653.38 ± 23.73    | 720.00 ± 34.93    | 748.49 ± 70.75                              | 653.20 ± 43.78    | 673.54 ± 19.72     | 717.00 ± 58.12                    | 680.30 ± 66.39    | 623.08 ± 25.63     |
| Fe_KW                      |                                 | (mg/Kg)           | 18750.89 ± 224.77 | 21163.55 ± 408.08 | 18515.74 ± 677.35                           | 17016.41 ± 436.30 | 24757.01 ± 890.56  | 16778.96 ± 442.74                 | 18430.64 ± 449.81 | 24335.84 ± 901.78  |
| Cu_KW                      |                                 | (mg/Kg)           | 21.50 ± 0.64      | 33.02 ± 0.80      | 19.23 ± 0.96                                | 19.57 ± 1.47      | 24.93 ± 0.80       | 17.18 ± 0.53                      | 18.16 ± 0.56      | 25.07 ± 1.11       |
| Zn_KW                      |                                 | (mg/Kg)           | 46.49 ± 2.18      | 53.34 ± 1.44      | 50.70 ± 1.55                                | 45.30 ± 1.39      | 65.33 ± 2.10       | 49.18 ± 1.37                      | 53.38 ± 1.47      | 69.97 ± 2.38       |
| Al_KW                      |                                 | (mg/Kg)           | 23817.27 ± 491.56 | 26869.82 ± 741.26 | 20926.41 ± 706.91                           | 19208.92 ± 713.04 | 30127.89 ± 1047.27 | 18802.24 ± 494.79                 | 20757.97 ± 402.32 | 29226.33 ± 1044.54 |
| Mo_KW                      |                                 | (mg/Kg)           | 0.74 ± 0.03       | 0.78 ± 0.04       | 0.40 ± 0.02                                 | 0.36 ± 0.04       | 0.43 ± 0.02        | 0.41 ± 0.02                       | 0.46 ± 0.02       | 0.52 ± 0.04        |
